# Supplementary material
Source: MDPI journal article supplement (https://www.mdpi.com/2306-5338/10/7/155)
Supplement: s1 [file s1]

Figure S1: Site 1 photos

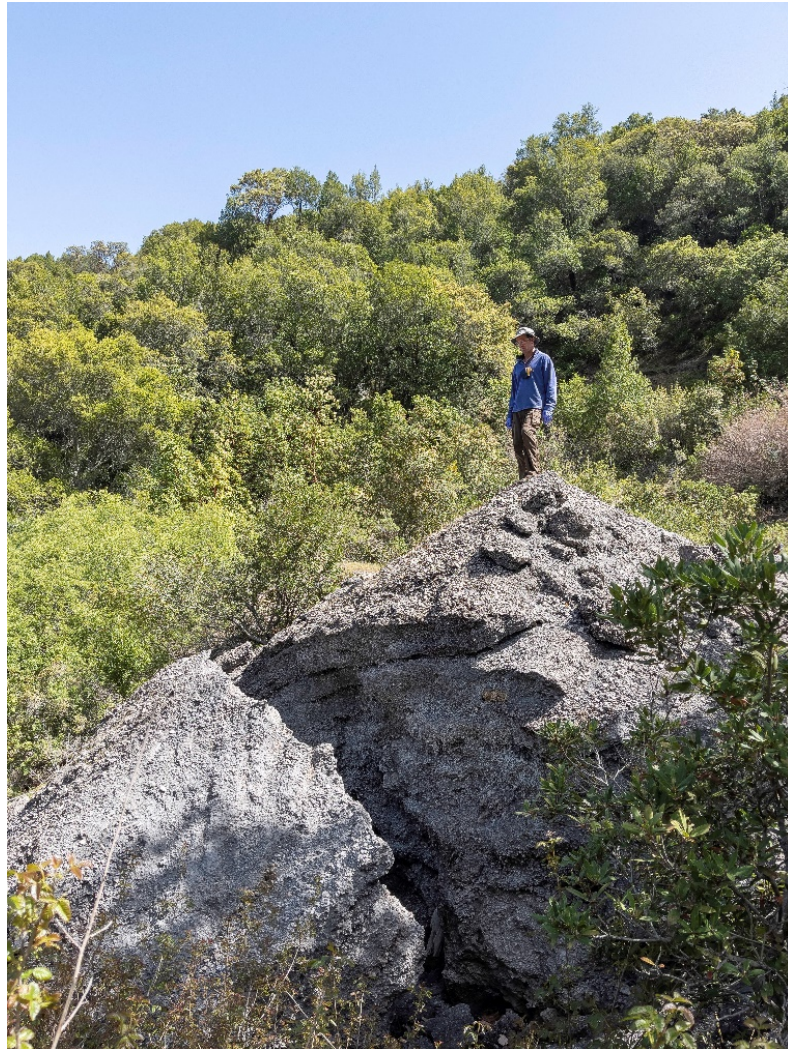

(A) calcines pile hardened and fractured above the stream channel.

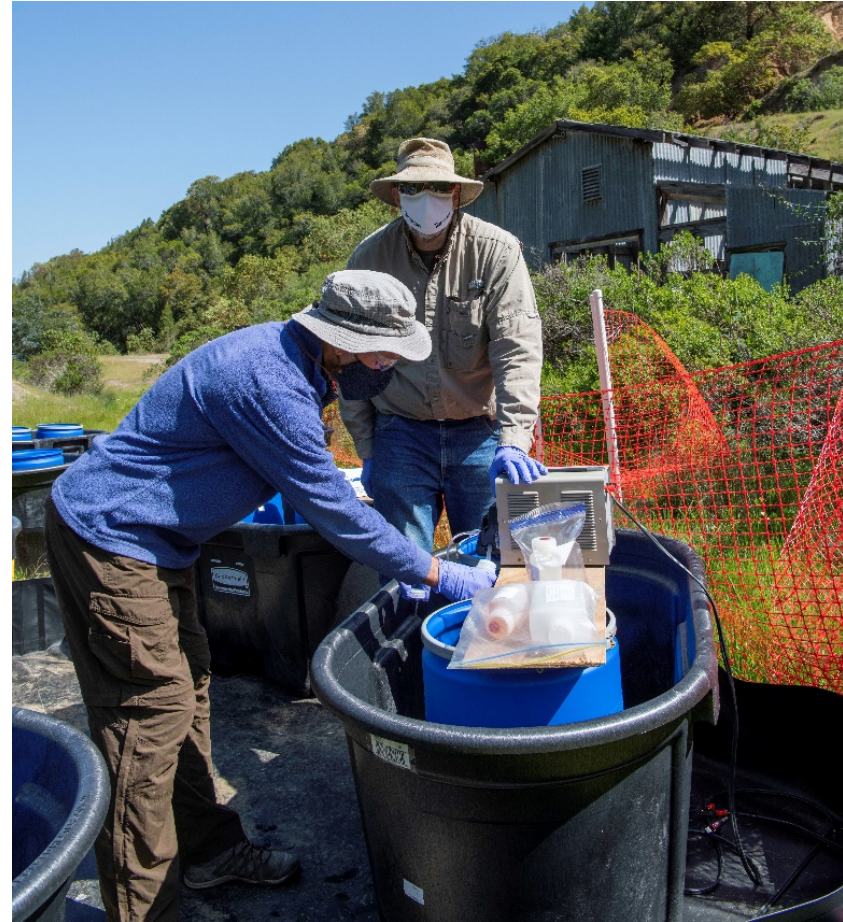

(B) Sampling leachate from test buckets at Site 1.



Figure S2: Site 2 photos

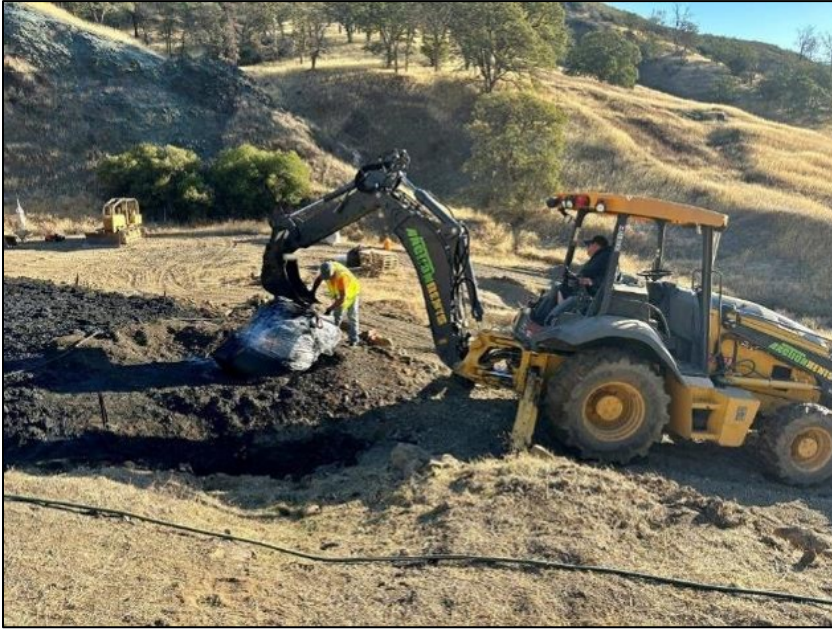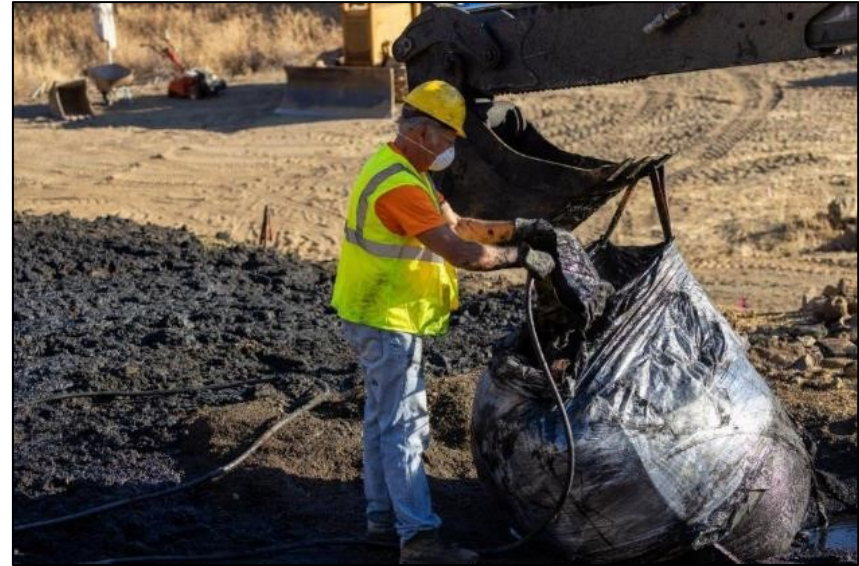

(A) Handling MercLok supersacks for the calcines cap.

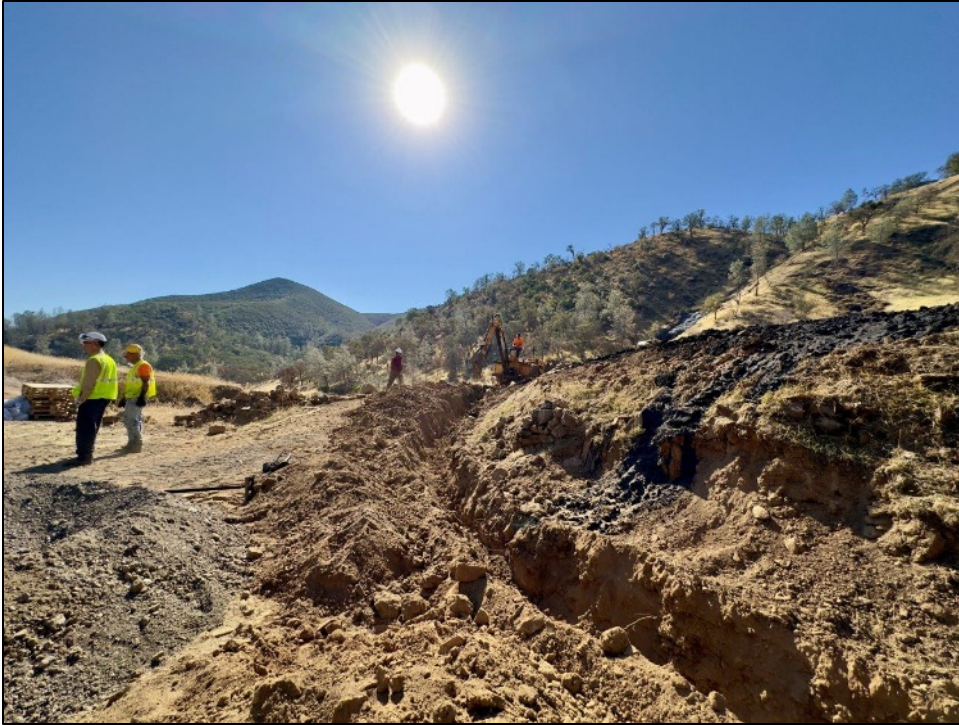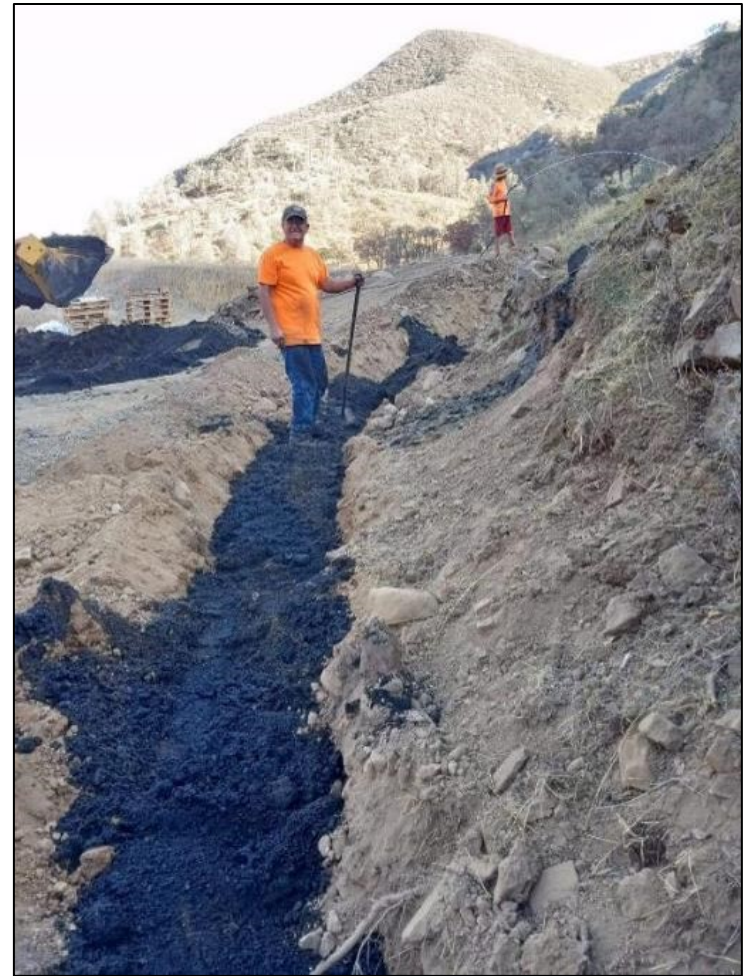

(B) Digging (left) and filling with MercLok-amended sandy soil (right) the lower permeable reactive barrier.



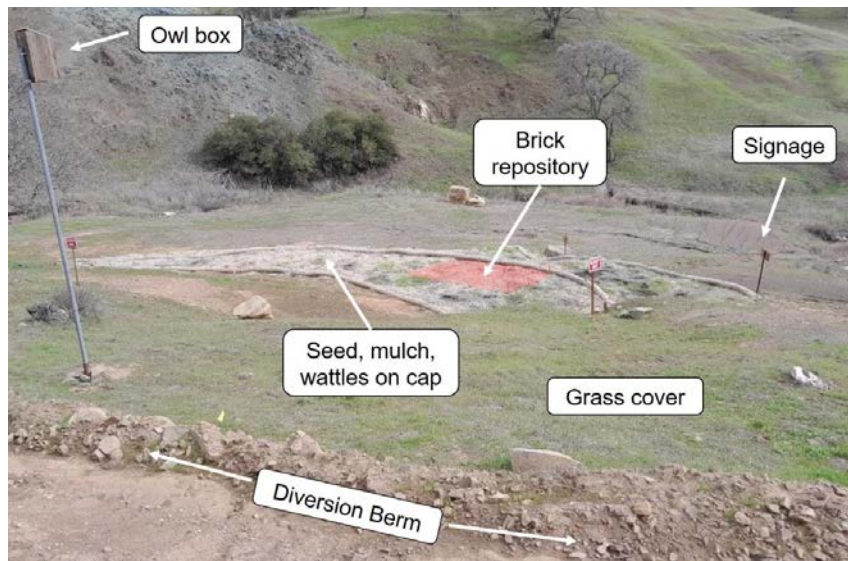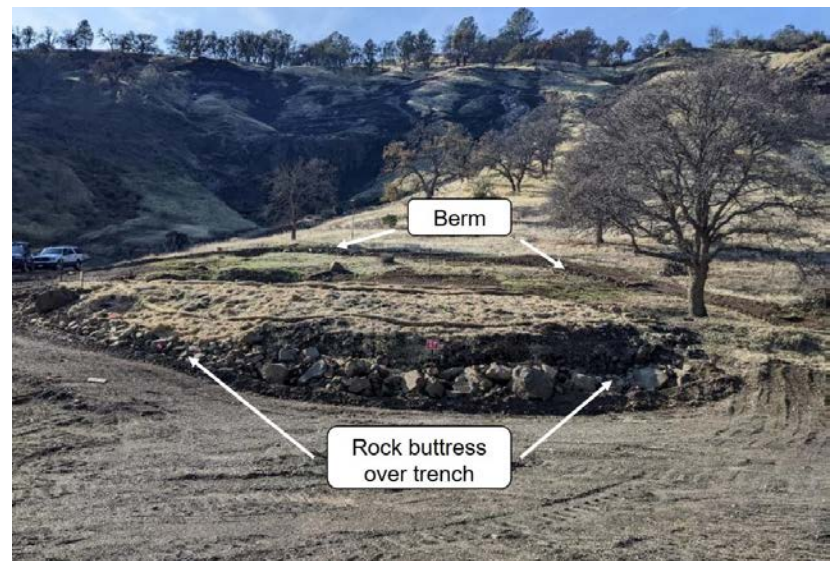

(C) Views of the remediated calcines pile from above (upper) and below (lower) with key components identified.
