# Supplementary material
Source: MDPI journal article supplement (https://www.mdpi.com/2306-5338/10/7/155)
Supplement: s1 [file s1]

**Supplementary Table**  
Site 1 Analytical Results – Total Metals  
in Leachate

| Material                                                                                      | Location                       | Water Source                                                 | Depth to Top of Soil (feet) | Sample Date | pH     | Arsenic (µg/L) | Barium (µg/L) | Cadmium (µg/L) | Chromium (µg/L) | Lead (µg/L)  | Selenium (µg/L) | Silver (µg/L) |
|-----------------------------------------------------------------------------------------------|--------------------------------|--------------------------------------------------------------|-----------------------------|-------------|--------|----------------|---------------|----------------|-----------------|--------------|-----------------|---------------|
| 1                                                                                             | AOC6 ALB2 5% Repository        | Rain                                                         | 0.75                        | 17-Feb-21   | NM     | 1.6            | 900           | <1.8           | 220             | 0.68         | 3.4             | <2.8          |
|                                                                                               |                                | 2L from stock tank after sampling                            | 0.78                        | 25-Mar-21   | 7.62   | 0.88           | 800           | <1.8           | 250             | 8.4          | 1.3             | <2.8          |
|                                                                                               |                                | 1gal DI on April 14, and 1gal DI on April 20 before sampling | 0.78                        | 20/Apr/21   | 7.59   | 2.1            | 410           | <1.8           | 200             | <13          | <4.2            | <2.8          |
|                                                                                               |                                | 2 gal DI on May 17                                           | 0.8                         | 18/May/21   | 7.78   | 4.1            | 270           | <1.8           | 170             | <13          | <4.2            | <2.8          |
| 2                                                                                             | AOC6 ALB2 5% Barrier           | Rain                                                         | 0.32                        | 17-Feb-21   | 7.22   | 1.4            | 1,400         | <1.8           | 170             | 1.0          | 2.8             | <2.8          |
|                                                                                               |                                | 2L from stock tank before sampling and 2L after sampling     | 0.4                         | 25-Mar-21   | 7.98   | 0.73           | 1,500         | <1.8           | 210             | 5.1          | 1.2             | <2.8          |
|                                                                                               |                                | 1gal DI on April 14, and 1gal DI on April 20 before sampling | 0.35                        | 20/Apr/21   | 7.92   | <2.1           | 610           | <1.8           | 96              | <13          | <4.2            | 5.7           |
|                                                                                               |                                | 2 gal DI on May 17                                           | 0.32                        | 18/May/21   | 7.55   | <2.1           | 430           | <1.8           | 79              | <13          | <4.2            | <2.8          |
| 3                                                                                             | AOC6 ALB2 1% Repository        | Rain                                                         | 0.77                        | 17-Feb-21   | 8.33   | 1.2            | 260           | <1.8           | 170             | 0.56         | <2.2            | <2.8          |
|                                                                                               |                                | 2L from stock tank before sampling and 2L after sampling     | 0.79                        | 25-Mar-21   | NM     | 0.72           | 240           | <1.8           | 130             | 3.3          | <1.1            | <2.8          |
|                                                                                               |                                | 1gal DI on April 14, and 1gal DI on April 20 before sampling | 0.77                        | 20/Apr/21   | 8.33   | 3.2            | 220           | <1.8           | 130             | <13          | <4.2            | <2.8          |
|                                                                                               |                                | 2 gal DI on May 17                                           | 0.76                        | 18/May/21   | 8.07   | <2.1           | 120           | <1.8           | 80              | <13          | <4.2            | <2.8          |
| 4                                                                                             | AOC6 ALB2 1% Barrier           | Rain                                                         | 0.47                        | 17-Feb-21   | 8.51   | 7.4            | 190           | <1.8           | 180             | 4.1          | <2.2            | <2.8          |
|                                                                                               |                                | 3L from stock tank before sampling and 2L after sampling     | 0.47                        | 25-Mar-21   | 8.34   | 0.87           | 160           | <1.8           | 180.00          | 7.1          | <1.1            | <2.8          |
|                                                                                               |                                | 1gal DI on April 14, and 1gal DI on April 20 before sampling | 0.45                        | 20/Apr/21   | 8.36   | 2.1            | 120           | <1.8           | 120             | <13          | <4.2            | <2.8          |
|                                                                                               |                                | 2 gal DI on May 17                                           | 0.44                        | 18/May/21   | 8.27   | <2.1           | 88            | <1.8           | 67              | <13          | <4.2            | <2.8          |
| 5                                                                                             | AOC6 MercLok 1% Barrier        | Rain                                                         | 0.46                        | 17-Feb-21   | 8.46   | 1.1            | 290           | <1.8           | 130             | 0.48         | <2.2            | 4.0           |
|                                                                                               |                                | 3L from stock tank before sampling and 2L after sampling     | 0.48                        | 25-Mar-21   | 8.31   | 0.92           | 280           | <1.8           | 93              | 5.7          | <1.1            | <2.8          |
|                                                                                               |                                | 1gal DI on April 14, and 1gal DI on April 20 before sampling | 0.45                        | 20/Apr/21   | NM     | <2.1           | 230           | <1.8           | 140             | <13          | <4.2            | <2.8          |
|                                                                                               |                                |                                                              | 0.44                        | 18/May/21   | 8.06   | <2.1           | 190           | <1.8           | 150             | <13          | <4.2            | <2.8          |
| 6                                                                                             | AOC6 MercLok 1% Barrier Dup    | Rain                                                         | 0.44                        | 17-Feb-21   | 8.51   | 1.3            | 290           | <1.8           | 260             | 4.2          | <2.2            | <2.8          |
|                                                                                               |                                | 3L from stock tank before sampling                           | 0.52                        | 25-Mar-21   | 8.67   | 1.0            | 290           | <1.8           | 310             | 8.2          | 1.2             | <2.8          |
|                                                                                               |                                | 1gal DI on April 14, and 1gal DI on April 20 before sampling | 0.49                        | 20/Apr/21   | 7.98   | <2.1           | 260           | <1.8           | 250             | <13          | <4.2            | <2.8          |
|                                                                                               |                                | 2 gal DI on May 17                                           | 0.48                        | 18/May/21   | 8.2    | <2.1           | 140           | <1.8           | 200             | <13          | <4.2            | <2.8          |
| 7                                                                                             | AOC6 MercLok 5% Barrier        | Rain                                                         | 0.47                        | 17-Feb-21   | 8.14   | 0.66           | 1,400         | <1.8           | 100             | 0.46         | <2.2            | <2.8          |
|                                                                                               |                                | 2L from stock tank before sampling and 2L after sampling     | 0.54                        | 25-Mar-21   | 10.04  | 0.86           | 1,300         | <1.8           | 170             | 5.2          | 1.8             | <2.8          |
|                                                                                               |                                | 1gal DI on April 14, and 1gal DI on April 20 before sampling | 0.47                        | 20/Apr/21   | NM     | 2.8            | 1,000         | <1.8           | 150             | <13          | <4.2            | <2.8          |
|                                                                                               |                                | 2 gal DI on May 17                                           | 0.47                        | 18/May/21   | 7.96   | 2.4            | 390           | <1.8           | 110             | <13          | <4.2            | <2.8          |
| 8                                                                                             | AOC6 MercLok 5% Repository     | Rain                                                         | 0.77                        | 17-Feb-21   | 8.24   | 2.2            | 1,300         | <1.8           | 140             | 2.2          | 4.4             | <2.8          |
|                                                                                               |                                | 2L from stock tank before sampling and 2L after sampling     | 0.79                        | 25-Mar-21   | 8.54   | 0.60           | 890           | <1.8           | 98              | 6.5          | <1.1            | <2.8          |
|                                                                                               |                                | 1gal DI on April 14, and 1gal DI on April 20 before sampling | 0.80                        | 20/Apr/21   | 8.13   | 2.2            | 860           | <1.8           | 110             | <13          | <4.2            | 4.1           |
|                                                                                               |                                | 2 gal DI on May 17                                           | 0.79                        | 18/May/21   | NM     | <2.1           | 630           | <1.8           | 150             | <13          | <4.2            | <2.8          |
| 9                                                                                             | AOC 6 Repository Control       | Rain                                                         | 0.75                        | 17-Feb-21   | 8.81   | 2.3            | 87            | <1.8           | 330             | 0.49         | <2.2            | <2.8          |
|                                                                                               |                                | 2L from stock tank before sampling and 2L after sampling     | 0.79                        | 25-Mar-21   | 8.60   | 1.8            | 74            | <1.8           | 230             | 7.9          | <1.1            | <2.8          |
|                                                                                               |                                | 1gal DI on April 14, and 1gal DI on April 20 before sampling | 0.82                        | 20/Apr/21   | 8.56   | 2.8            | 83            | <1.8           | 180             | <13          | <4.2            | <2.8          |
|                                                                                               |                                | 2 gal DI on May 17                                           | 0.78                        | 18/May/21   | 8.5    | 6.2            | 49            | <1.8           | 120             | <13          | <4.2            | <2.8          |
| 10                                                                                            | AOC 6 Barrier Control          | Rain                                                         | 0.61                        | 17-Feb-21   | 8.57   | 2.1            | 94            | <1.8           | 280             | 0.85         | <2.2            | <2.8          |
|                                                                                               |                                | 3L from stock tank before sampling and 2L after sampling     | 0.67                        | 25-Mar-21   | 8.59   | 1.7            | 88            | <1.8           | 220             | 9.0          | <1.1            | <2.8          |
|                                                                                               |                                | 1gal DI on April 14, and 1gal DI on April 20 before sampling | 0.61                        | 20/Apr/21   | 9.02   | <2.1           | 82            | <1.8           | 190             | <13          | <4.2            | <2.8          |
|                                                                                               |                                | 2 gal DI on May 17                                           | 0.59                        | 18/May/21   | 8.47   | <2.1           | 73            | <1.8           | 170             | <13          | <4.2            | <2.8          |
| BOB                                                                                           |                                |                                                              |                             |             |        |                |               |                |                 |              |                 |               |
| 11                                                                                            | AOC6 MercLok 1% Repository Dup | Rain                                                         | 0.81                        | 17-Feb-21   | 8.44   | 2.5            | 390           | <1.8           | 230             | 2.2          | 4.6             | <2.8          |
|                                                                                               |                                | 2L from stock tank before sampling and 2L after sampling     | 0.83                        | 25-Mar-21   | 8.36   | 10             | 250           | <1.8           | 180             | 8.1          | <1.1            | <2.8          |
|                                                                                               |                                | 1gal DI on April 14, and 1gal DI on April 20 before sampling | 0.83                        | 20/Apr/21   | 8.91   | <2.1           | 220           | <1.8           | 180             | <13          | <4.2            | <2.8          |
|                                                                                               |                                | 2 gal DI on May 17                                           | 0.81                        | 18/May/21   | 8.1    | 3.2            | 260           | <1.8           | 190             | <13          | <4.2            | <2.8          |
| 12                                                                                            | AOC6 MercLok 1% Repository     | Rain                                                         | 0.79                        | 17-Feb-21   | NM     | 1.4            | 280           | <1.8           | 140             | 2.3          | <2.2            | <2.8          |
|                                                                                               |                                | 2L from stock tank before sampling and 2L after sampling     | 0.79                        | 25-Mar-21   | 8.20   | 0.77           | 260           | <1.8           | 120             | 7.6          | <1.1            | <2.8          |
|                                                                                               |                                | 1gal DI on April 14, and 1gal DI on April 20 before sampling | 0.82                        | 20/Apr/21   | 8.86   | <2.1           | 220           | <1.8           | 120             | <13          | <4.2            | <2.8          |
|                                                                                               |                                | 2 gal DI on May 17                                           | 0.79                        | 18/May/21   | 8.01   | 3.4            | 230           | <1.8           | 190             | <13          | <4.2            | <2.8          |
| 13                                                                                            | AOC X Repository Control       | Rain                                                         | 0.94                        | 17-Feb-21   | 8.44   | 3.7            | 120           | <1.8           | 160             | 1.0          | 2.4             | <2.8          |
|                                                                                               |                                | 2L from stock tank before sampling and 2L after sampling     | 0.97                        | 25-Mar-21   | 8.40   | 3.0            | 120           | <1.8           | 150             | 6.8          | 1.5             | <2.8          |
|                                                                                               |                                | 1gal DI on April 14, and 1gal DI on April 20 before sampling | 0.98                        | 20/Apr/21   | 8.78   | 3.5            | 84            | <1.8           | 150             | <13          | <4.2            | <2.8          |
|                                                                                               |                                | 2 gal DI on May 17                                           | 0.98                        | 18/May/21   | 8.33   | 4.1            | 130           | <1.8           | 180             | <13          | <4.2            | <2.8          |
| 14                                                                                            | AOCX MercLok 5% Repository     | Rain                                                         | 0.85                        | 17-Feb-21   | 7.66   | 0.85           | 820           | <1.8           | 120             | <0.46        | <2.2            | <2.8          |
|                                                                                               |                                | 2L from stock tank before sampling and 2L after sampling     | 0.94                        | 25-Mar-21   | 7.81   | 0.82           | 640           | <1.8           | 87              | 6.5          | <1.1            | <2.8          |
|                                                                                               |                                | 1gal DI on April 14, and 1gal DI on April 20 before sampling | 0.89                        | 20/Apr/21   | 8.27   | <2.1           | 530           | <1.8           | 99              | <13          | <4.2            | 3.8           |
|                                                                                               |                                | 2 gal DI on May 17                                           | 0.86                        | 18/May/21   | 7.49   | 3.9            | 430           | <1.8           | 120             | <13          | <4.2            | <2.8          |
| 15                                                                                            | AOCX MercLok 5% Repository Dup | Rain                                                         | 0.78                        | 17-Feb-21   | 7.62   | 1.2            | 1,000         | <1.8           | 130             | <0.46        | 3.2             | <2.8          |
|                                                                                               |                                | 2L from stock tank before sampling and 2L after sampling     | 0.88                        | 25-Mar-21   | 7.76   | 0.98           | 770           | <1.8           | 110             | 6.5          | <1.1            | <2.8          |
|                                                                                               |                                | 1gal DI on April 14, and 1gal DI on April 20 before sampling | 0.86                        | 20/Apr/21   | 8.16   | 3.8            | 550           | <1.8           | 120             | <13          | <4.2            | <2.8          |
|                                                                                               |                                | 2 gal DI on May 17                                           | 0.83                        | 18/May/21   | 7.85   | 2.5            | 310           | <1.8           | 88              | <13          | <4.2            | <2.8          |
| 16                                                                                            | AOCX MercLok 10% Repository    | Rain                                                         | 0.85                        | 17-Feb-21   | NM     | 1.2            | 1,000         | <1.8           | 150             | 0.66         | 3.0             | <2.8          |
|                                                                                               |                                | 2L from stock tank before sampling and 2L after sampling     | 0.86                        | 25-Mar-21   | 7.63   | 1.5            | 790           | <1.8           | 170             | 4.6          | 2.3             | <2.8          |
|                                                                                               |                                | 1gal DI on April 14, and 1gal DI on April 20 before sampling | 0.87                        | 20/Apr/21   | 8.14   | 3.0            | 510           | <1.8           | 110             | <13          | <4.2            | 3.7           |
|                                                                                               |                                | 2 gal DI on May 17                                           | 0.86                        | 18/May/21   | 7.64   | <2.1           | 320           | <1.8           | 91              | <13          | <4.2            | <2.8          |
| Water Quality Numerical Limits <sup>1</sup>                                                   |                                |                                                              |                             |             |        | 10             | 1,000         | 5.0            | 50              | 9.8          | 5               | 31            |
|                                                                                               |                                |                                                              |                             |             | 6 to 9 | MCL            | MCL           | MCL            | MCL             | CTR-Fresh AL | CTR-Fresh AL    | CTR-Fresh AL  |
| San Francisco Regional Water Quality Control Board Tier 1 Environmental Screening Levels 2019 |                                |                                                              |                             |             |        | 10             | 1,000         | 0.25           | 50.00           | 2.50         | 0.19            | 2.00          |
