# Supplementary material
Source: MDPI journal article supplement (https://www.mdpi.com/2306-5338/10/7/155)
Supplement: s1 [file s1]

Archive with 3 entries (3 files):
- Supplementary Photos.pdf
- Supplementary Table.pdf
- Supplementary Techn Info.pdf
